# Supplementary material for: Direct and indirect healthcare and carbon savings with ACTIVE Particle ControlTM air-purification
Source: Frontiers journal article supplement (doi:10.3389/fpubh.2022.1073858), 2023-01-04

## Supplementary Material

### Supplementary Figure 1. EPA energy-carbon equivalency calculator.

<https://www.epa.gov/energy/greenhouse-gas-equivalencies-calculator#results>

#### SecureAire Energy Calculator

**Manufactures Representative:**

**Project Name:**

Building size:  SF

**HVAC Operation:**

Hours:  per week  
 Weeks:  per year  
 Utility rate:  per kWh  
 Potential Utility rebate:

**HVAC System Details:**

Air Handler:   
 Fan Static w/o Filter:  w.g.  
 Motor/Blower Efficiency:   
 Air Handler Size:  CFM  
 Filter Positions:  Number

**Published Filter Data:**

|                              | SecureAire | Varicel RF |
|------------------------------|------------|------------|
| Manufacturer:                | SecureAire | Varicel RF |
| Model:                       | ACS        | M14        |
| Initial Pressure Drop:       | 0.25       | 0.50       |
| Final Pressure Drop:         | 0.80       | 1.25       |
| Avg Prefilter Pressure Drop: | 0.00       | 0.00       |
| Filter Life:                 | 18         | 6          |
| Power Consumption:           | 5 W        |            |
| Replacement Filter Price:    | \$85       | \$120      |
| Annual filter cost:          | \$3,400    | \$14,400   |

**Energy Savings Calculations**

|                             |            |             |
|-----------------------------|------------|-------------|
| Annual Energy Savings:      | 80,288 kWh | \$15,255    |
| SecureAire Usage:           | 2,621 kWh  | (\$498)     |
| Annual Filter Cost Savings: |            | \$11,000    |
| Net Total Annual Savings:   |            | \$25,757    |
| Annual CO2 savings:         | 104,850    | pounds      |
| CO2 savings / SF:           | 0.87       | pounds / SF |
| Peak Energy Reduction:      | 13 kW      |             |

**SecureAire Payback and Costs**

|                                   | SecureAire | Varicel RF |
|-----------------------------------|------------|------------|
| Material First Cost:              | \$1,000    | \$120      |
| Installation Cost:                | \$60       | \$60       |
| Total Installation Cost:          | \$63,600   | \$10,800   |
| SecureAire System Net First Cost: | \$52,800   |            |

**Simple Payback:**  Years

Estimated Utility Rebate:  By Peak kW Savings

First Cost, Net of Rebate:

**Payback w/ Rebate:**  Years

*SecureAire*

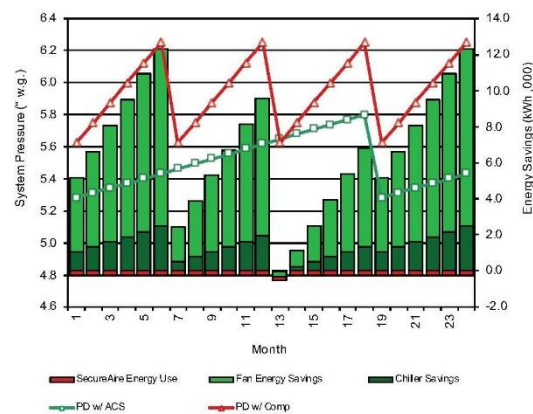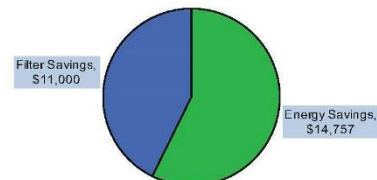

**Supplementary Figure 2.** Cumulative Direct Savings from healthcare-associated infection (HAI) avoidance, energy and maintenance savings, and retained revenue with ACTIVE Particle Control™ (APC) technology. Realized savings for 2019, 2020, and 2021. Calculated savings for 2022. All data is independent of COVID-19 impact.

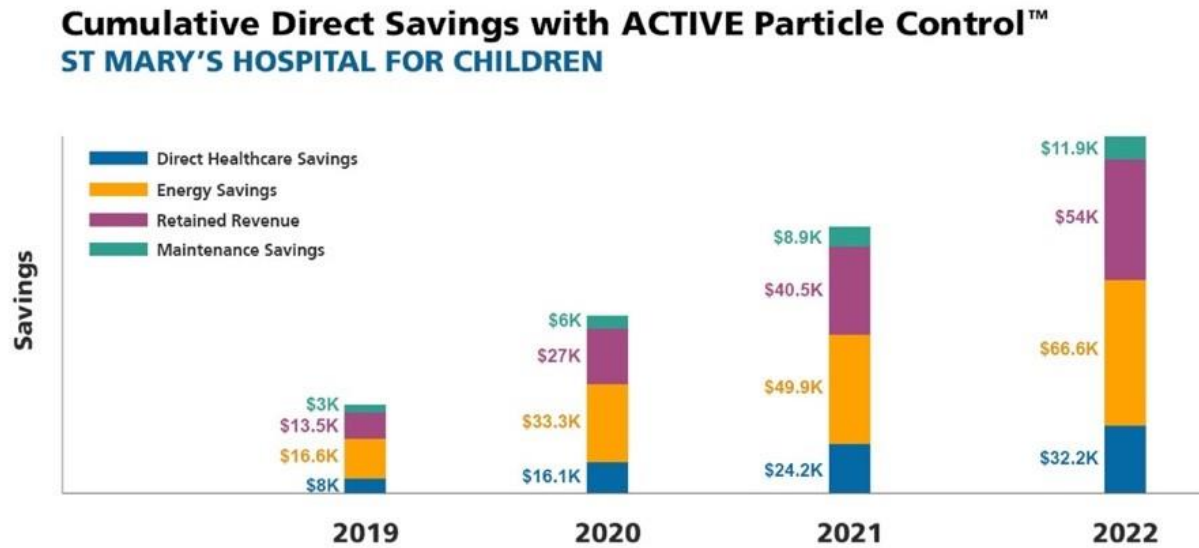

Supplement: Data_Sheet_1.PDF [file Data_Sheet_1.PDF]
